# Supplementary material
Source: PubMed Central journal article supplement (PMC9027677)

|         | N    | Events |
|---------|------|--------|
| Overall | 3715 | 1517   |

### A. Biomarkers of Volume Overload

Quartiles of In-Hospital  
% Change in BNP

|             |     |     |
|-------------|-----|-----|
| (6, 3787]   | 602 | 250 |
| (-27, 6]    | 594 | 226 |
| (-54, -27]  | 600 | 195 |
| [-100, -54) | 598 | 182 |

Quartiles of In-Hospital  
% Change in NT-proBNP

|            |     |     |
|------------|-----|-----|
| (-2, 833]  | 312 | 188 |
| (-30, -2]  | 311 | 183 |
| (-54, -30] | 311 | 159 |
| [-99, -54) | 308 | 142 |

Quartiles of In-Hospital  
Change in Weight

|               |     |     |
|---------------|-----|-----|
| (-1, 13.2]    | 967 | 423 |
| (-2.5, -1]    | 871 | 330 |
| (-4.7, -2.5]  | 897 | 360 |
| [-26.7, -4.7) | 902 | 364 |

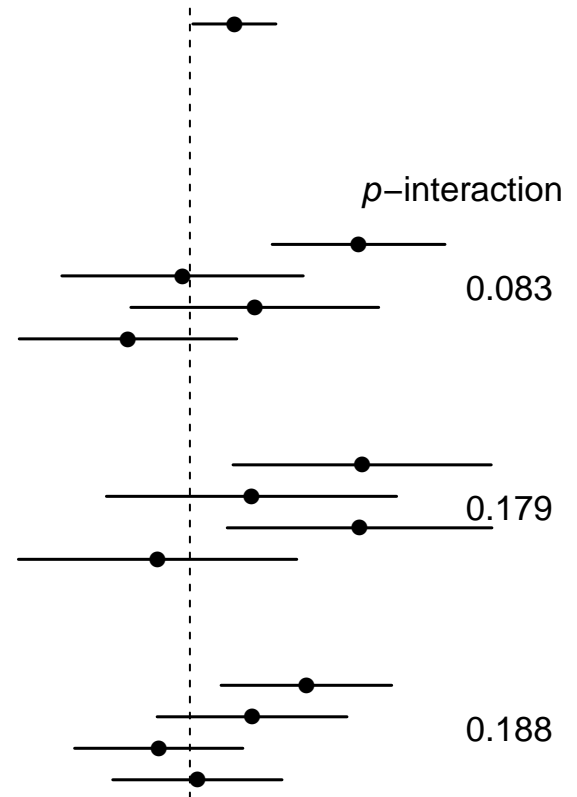

### B. Biomarkers of Hemoconcentration

Quartiles of In-Hospital  
Change in Hematocrit

|           |      |     |
|-----------|------|-----|
| [-27, -1) | 706  | 311 |
| (-1, 1]   | 701  | 275 |
| (1, 3]    | 1116 | 445 |
| (3, 29]   | 699  | 266 |

Quartiles of In-Hospital  
Change in Albumin

|              |     |     |
|--------------|-----|-----|
| [-2.2, -0.1) | 893 | 386 |
| (-0.1, 0.1]  | 961 | 384 |
| (0.1, 0.3]   | 919 | 383 |
| (0.3, 1.8]   | 841 | 316 |

Quartiles of In-Hospital  
Change in Total Protein

|             |     |     |
|-------------|-----|-----|
| [-3, -0.2)  | 941 | 395 |
| (-0.2, 0.2] | 993 | 441 |
| (0.2, 0.6]  | 893 | 346 |
| (0.6, 3]    | 885 | 333 |

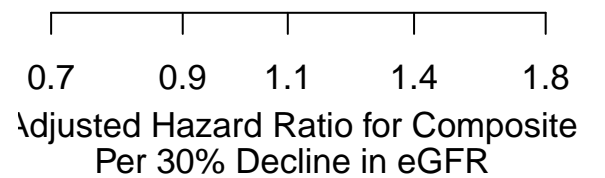

Supplement: NIHMS1785352-supplement-Online_Figure_2.pdf [file NIHMS1785352-supplement-Online_Figure_2.pdf]
