# Supplementary material
Source: PubMed Central journal article supplement (PMC9027677)

## A. Biomarkers of Volume Overload

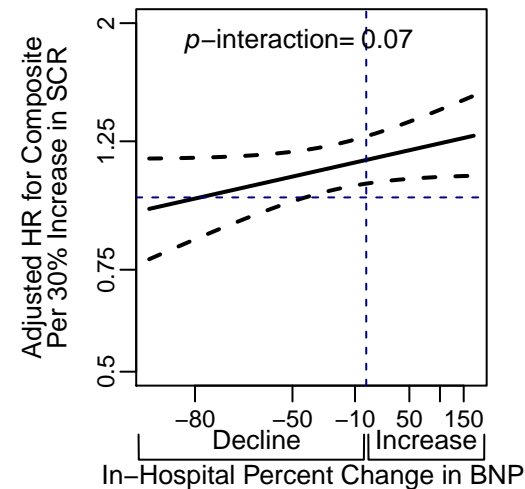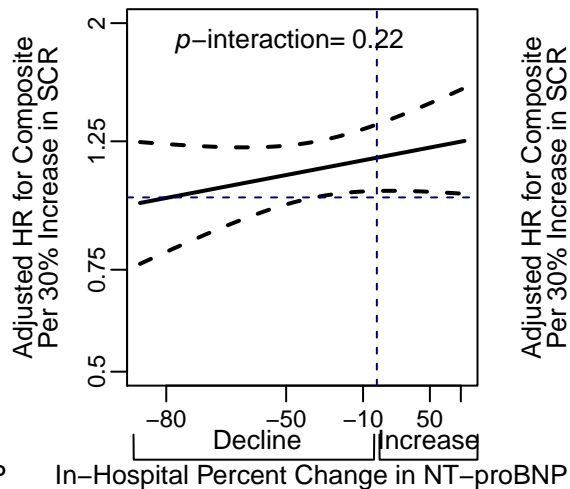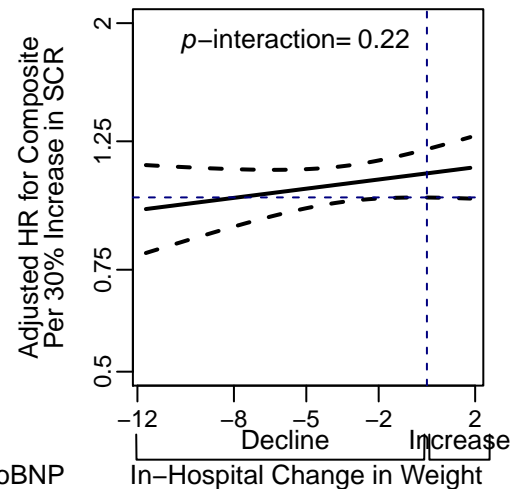

## B. Biomarkers of Hemoconcentration

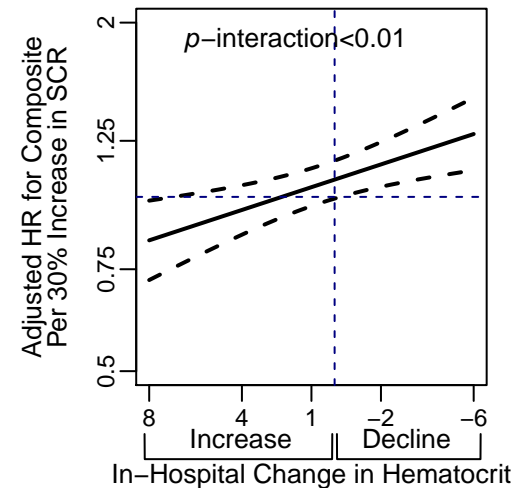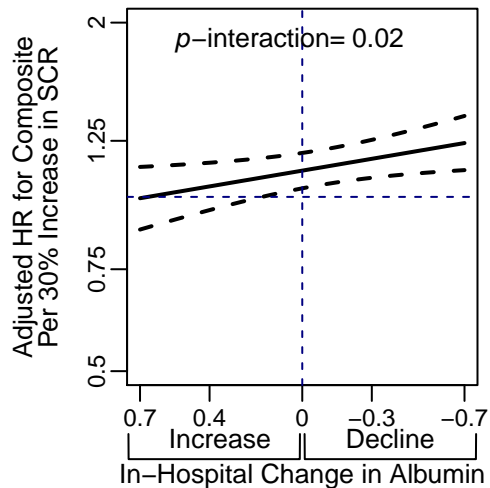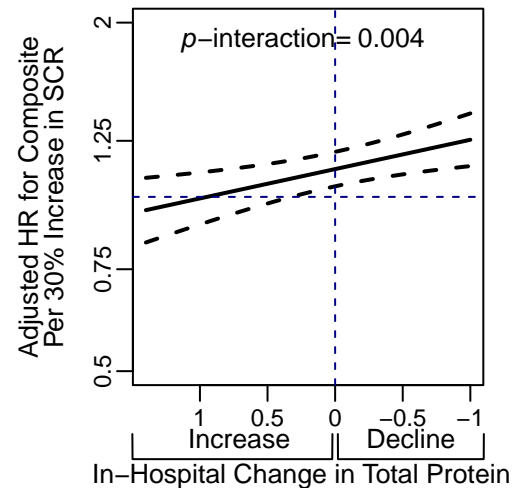

Supplement: NIHMS1785352-supplement-Online_Figure_5.pdf [file NIHMS1785352-supplement-Online_Figure_5.pdf]
